# Supplementary material
Source: publisher figshare collection journal article supplement (https://tandf.figshare.com/ndownloader/files/4912591)
Supplement: Supplementary file 1 [file 4912591]

Supplemental Table 1. Correlation analysis results for the Infant Birth Weight Distribution Data (n=144).

|  | **GA** | **BW/GA** | **SysBP** | **DiaBP** | **MAGE** | **BMI** | **BET-1** | **ET-1** | **ET-2** | **ET-3** | **ISOP** | **CRP** | **ICAM-1** | **VCAM-1** | **MMP-1** | **MMP-2** | **MMP-7** | **MMP-9** | **MMP-10** | **VEGF** |
| --- | --- | --- | --- | --- | --- | --- | --- | --- | --- | --- | --- | --- | --- | --- | --- | --- | --- | --- | --- | --- |
| **BW** | 0.474* | 0.948* | -0.104 | -0.101 | 0.059 | 0.113 | -0.115 | -0.050 | -0.050 | -0.013 | -0.104 | 0.112 | -0.104 | -0.061 | -0.163a | -0.043 | -0.024 | -0.265* | -0.069 | 0.330* |
| **GA** |  | 0.176* | -0.068 | -0.131 | -0.028 | -0.001 | 0.048 | -0.005 | 0.024 | -0.056 | -0.028 | 0.090 | -0.233* | -0.247* | -0.176* | -0.296* | -0.082 | -0.123 | -0.146a | 0.199* |
| **BW/GA** |  |  | -0.085 | -0.069 | 0.069 | 0.120 | -0.147a | -0.054 | -0.065 | 0.008 | -0.108 | 0.087 | -0.026 | 0.022 | -0.135 | 0.067 | 0.005 | -0.257* | -0.028 | 0.287* |
| **SysBP** |  |  |  | 0.629* | -0.079 | 0.242* | -0.072 | 0.025 | 0.066 | 0.045 | 0.005 | 0.165* | -0.022 | 0.095 | 0.016 | 0.010 | 0.097 | 0.189* | 0.031 | -0.078 |
| **DiaBP** |  |  |  |  | 0.046 | 0.371* | -0.131 | 0.040 | 0.032 | 0.097 | 0.106 | 0.223* | -0.002 | 0.110 | 0.162a | 0.019 | 0.010 | 0.205* | -0.053 | -0.084 |
| **MAGE** |  |  |  |  |  | 0.0332 | 0.087 | -0.007 | 0.068 | -0.015 | 0.083 | 0.039 | 0.134 | 0.106 | 0.038 | 0.035 | -0.075 | -0.111 | 0.0285 | -0.027 |
| **BMI** |  |  |  |  |  |  | -0.104 | 0.081 | -0.001 | 0.001 | 0.164* | 0.485* | 0.162a | 0.125 | 0.022 | -0.130 | -0.249* | 0.056 | -0.102 | 0.123 |
| **BET-1** |  |  |  |  |  |  |  | -0.189* | 0.429* | -0.251* | -0.082 | 0.095 | -0.119 | -0.109 | 0.045 | -0.029 | 0.057 | 0.066 | 0.076 | 0.117 |
| **ET-1** |  |  |  |  |  |  |  |  | -0.156a | 0.668* | 0.241* | 0.040 | 0.354* | 0.327* | -0.107 | 0.295* | 0.054 | 0.134 | 0.141a | 0.010 |
| **ET-2** |  |  |  |  |  |  |  |  |  | -0.318* | 0.166* | 0.245* | -0.148a | -0.222* | 0.003 | -0.084 | -0.081 | 0.199* | -0.069 | 0.090 |
| **ET-3** |  |  |  |  |  |  |  |  |  |  | 0.186* | -0.102 | 0.450* | 0.464* | -0.091 | 0.316* | 0.054 | 0.050 | 0.043 | -0.114 |
| **ISOP** |  |  |  |  |  |  |  |  |  |  |  | 0.143a | 0.292* | 0.144a | 0.055 | 0.061 | -0.161a | -0.017 | -0.015 | -0.108 |
| **CRP** |  |  |  |  |  |  |  |  |  |  |  |  | -0.132 | -0.128 | -0.021 | -0.079 | -0.014 | 0.103 | 0.099 | 0.431* |
| **ICAM-1** |  |  |  |  |  |  |  |  |  |  |  |  |  | 0.713* | 0.228* | 0.412* | -0.147a | 0.009 | 0.130 | -0.076 |
| **VCAM-1** |  |  |  |  |  |  |  |  |  |  |  |  |  |  | 0.132 | 0.526* | 0.044 | 0.049 | 0.016 | -0.065 |
| **MMP-1** |  |  |  |  |  |  |  |  |  |  |  |  |  |  |  | 0.146a | 0.007 | 0.332* | 0.127 | 0.009 |
| **MMP-2** |  |  |  |  |  |  |  |  |  |  |  |  |  |  |  |  | 0.218* | 0.130 | 0.226* | -0.070 |
| **MMP-7** |  |  |  |  |  |  |  |  |  |  |  |  |  |  |  |  |  | 0.166* | 0.153a | 0.040 |
| **MMP-9** |  |  |  |  |  |  |  |  |  |  |  |  |  |  |  |  |  |  | -0.049 | -0.121 |
| **MMP-10** |  |  |  |  |  |  |  |  |  |  |  |  |  |  |  |  |  |  |  | 0.063 |

*: p< 0.05

a: p<0.1

BW: infant birth weight

GA: Gestational age

SYS: Systolic blood pressure

DIA: Diastolic blood pressure

BMI: Body mass index

MAGE: Maternal age
